# Supplementary material for: Surface engineering of phosphorene nanoribbons by transition metal heteroatoms for spintronics
Source: Royal Society of Chemistry journal article supplement (doi:10.1039/c9cp00072k), 2019-01-01
Supplement: c9cp00072k1.pdf [file c9cp00072k1.pdf]

Supporting Information for  
**Surface engineering of phosphorene nanoribbons by transition metal  
heteroatoms for spintronics**

Mi-Mi Dong<sup>a</sup>, Zi-Qun Wang<sup>a</sup>, Guang-Ping Zhang<sup>a</sup>, Chuan-Kui Wang<sup>a\*</sup>, Xiao-Xiao Fu<sup>a\*</sup>

<sup>a</sup> Shandong Province Key Laboratory of Medical Physics and Image Processing  
Technology, School of Physics and Electronics, Shandong Normal University, Jinan  
250358, China

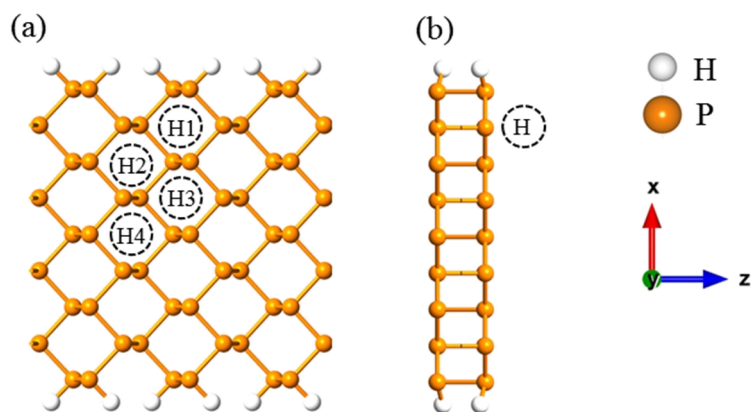

Fig. S1 (a) Top view and (b) side view for structures of H-APNR with 3 unit cells. Here, H1~H4 represent different hollow sites of adsorption for TM atoms.

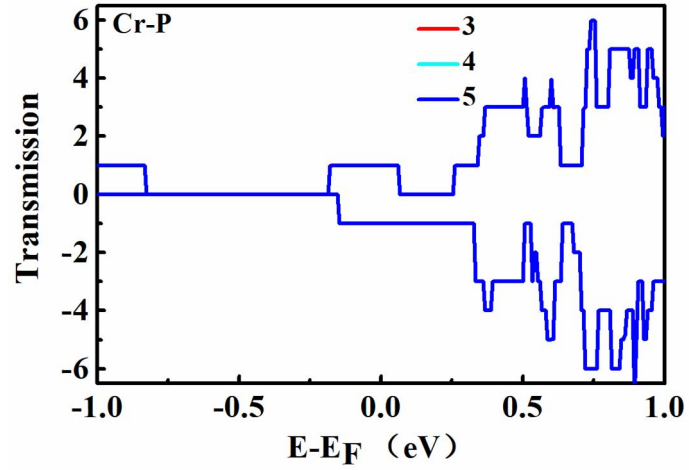

Fig. S2 The transmission spectra of Cr adsorbed H-APNRs for central region containing 3, 4, and 5 units with the zero bias in parallel spin configurations.

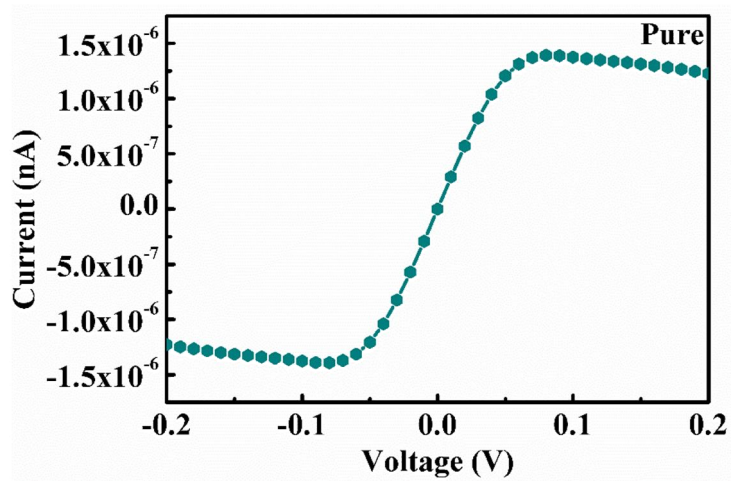

Fig. S3 Current-voltage characteristic curve of pure H-APNR.

**Table S1** The maximum displacements of phosphorus atoms in adsorption configurations from the initial locations in phosphene nanoribbons in the y direction ( $\Delta Y_{\text{Max}}$ ), shortest distances between TM atoms and phosphorus atom ( $d_{\text{TM-P}}$ ), adsorption energy ( $E_a$  and  $E_a^*$ ), cohesive energy ( $E_c$ ), magnetic moment ( $M$ ), and the charge transfer ( $\Delta Q$ ) of TM atoms.

| Adatom | Site | $\Delta Y_{\text{Max}}$<br>(Å) | $d_{\text{TM-P}}$<br>(Å) | $E_a$<br>(eV) | $E_a^*$<br>(eV) | $E_c$ (eV) | $M$ ( $\mu_B$ ) | $\Delta Q$<br>(e) |
|--------|------|--------------------------------|--------------------------|---------------|-----------------|------------|-----------------|-------------------|
| Sc     | H1   | 0.31                           | 2.55                     | -3.46         | –               |            | 0.71            |                   |
|        | H2   | 0.26                           | 2.57                     | -3.45         | –               |            | 0.76            |                   |
|        | H3   | 0.29                           | 2.59                     | -3.46         | –               |            | 0.74            |                   |
|        | H4   | 0.28                           | 2.59                     | -3.46         | –               | -3.90      | 0.73            | -0.15             |
| Ti     | H1   | 0.38                           | 2.42                     | -4.10         | –               |            | 1.82            |                   |
|        | H2   | 0.29                           | 2.43                     | -4.08         | –               |            | 1.89            |                   |
|        | H3   | 0.30                           | 2.43                     | -4.15         | –               |            | 1.89            |                   |
|        | H4   | 0.30                           | 2.44                     | -4.16         | –               | -4.85      | 1.89            | -0.19             |
| V      | H1   | 0.31                           | 2.33                     | -2.82         | –               |            | 2.86            |                   |
|        | H2   | 0.37                           | 2.34                     | -2.85         | –               |            | 2.85            |                   |
|        | H3   | 0.30                           | 2.34                     | -2.86         | –               |            | 2.85            |                   |
|        | H4   | 0.38                           | 2.34                     | -2.86         | –               | -5.31      | 2.84            | -0.10             |
| Cr     | H1   | 0.06                           | 2.45                     | -2.92         | –               |            | 4.83            |                   |
|        | H2   | 0.09                           | 2.45                     | -3.02         | –               |            | 4.82            |                   |
|        | H3   | 0.09                           | 2.45                     | -3.05         | –               |            | 4.82            |                   |
|        | H4   | 0.04                           | 2.45                     | -3.05         | –               | -4.10      | 4.82            | -0.14             |
| Mn     | H1   | 0.72                           | 2.33                     | -2.13         | -1.20           |            | 4.72            |                   |
|        | H2   | 0.23                           | 2.06                     | -2.27         | -1.57           |            | 4.67            |                   |
|        | H3   | 0.17                           | 2.33                     | -2.26         | -1.57           |            | 4.65            |                   |
|        | H4   | 0.18                           | 2.33                     | -2.27         | -1.59           | -2.92      | 4.65            | -0.08             |
| Fe     | H1   | 0.07                           | 2.13                     | -4.10         | -3.06           |            | 2.29            |                   |
|        | H2   | 0.15                           | 2.13                     | -4.04         | -2.61           |            | 2.33            |                   |
|        | H3   | 0.18                           | 2.13                     | -4.06         | -2.94           |            | 2.33            |                   |
|        | H4   | 0.21                           | 2.14                     | -4.07         | -2.81           | -4.28      | 2.34            | -0.09             |
| Co     | H1   | 0.09                           | 2.11                     | -4.99         | -3.83           |            | 1.09            |                   |
|        | H2   | 0.24                           | 2.12                     | -4.95         | -3.85           |            | 1.04            |                   |
|        | H3   | 0.16                           | 2.12                     | -4.98         | -3.87           |            | 1.04            |                   |
|        | H4   | 0.16                           | 2.44                     | -4.99         | -3.88           | -4.39      | 1.04            | -0.07             |
| Ni     | H1   | 0.31                           | 2.12                     | -5.30         | -4.28           |            | 0.00            |                   |
|        | H2   | 0.26                           | 2.12                     | -5.29         | -4.26           |            | 0.00            |                   |
|        | H3   | 0.11                           | 2.12                     | -5.32         | -4.28           |            | 0.00            |                   |
|        | H4   | 0.08                           | 2.12                     | -5.33         | -4.29           | -4.44      | 0.00            | -0.06             |

$E_a^*$  represents the adsorption energy by the other group<sup>1</sup>.

**Table S2** The comparisons for the maximum displacements of phosphorus atoms in adsorption configurations from the initial locations in phosphorene nanoribbons in the y direction ( $\Delta Y_{\text{Max}}$ ), the shortest distances between TM atoms and phosphorus atom ( $d_{\text{TM-P}}$ ), and the adsorption energy ( $E_a$ ) without (no vdW) and with vdW consideration (vdW).

| Adatom | $\Delta Y_{\text{Max}}$ (Å) |      | $d_{\text{TM-P}}$ (Å) |      | $E_a$ (eV) |       |
|--------|-----------------------------|------|-----------------------|------|------------|-------|
|        | no vdW                      | vdW  | no vdW                | vdW  | no vdW     | vdW   |
| Sc     | 0.28                        | 0.25 | 2.59                  | 2.58 | -3.46      | -3.26 |
| Ti     | 0.30                        | 0.28 | 2.44                  | 2.44 | -4.16      | -4.16 |
| V      | 0.38                        | 0.37 | 2.34                  | 2.34 | -2.86      | -2.86 |
| Cr     | 0.04                        | 0.05 | 2.45                  | 2.45 | -3.05      | -3.05 |
| Mn     | 0.18                        | 0.21 | 2.33                  | 2.33 | -2.27      | -2.26 |
| Fe     | 0.21                        | 0.21 | 2.14                  | 2.13 | -4.07      | -4.06 |
| Co     | 0.16                        | 0.15 | 2.44                  | 2.43 | -4.99      | -5.01 |
| Ni     | 0.08                        | 0.11 | 2.12                  | 2.12 | -5.53      | -5.53 |

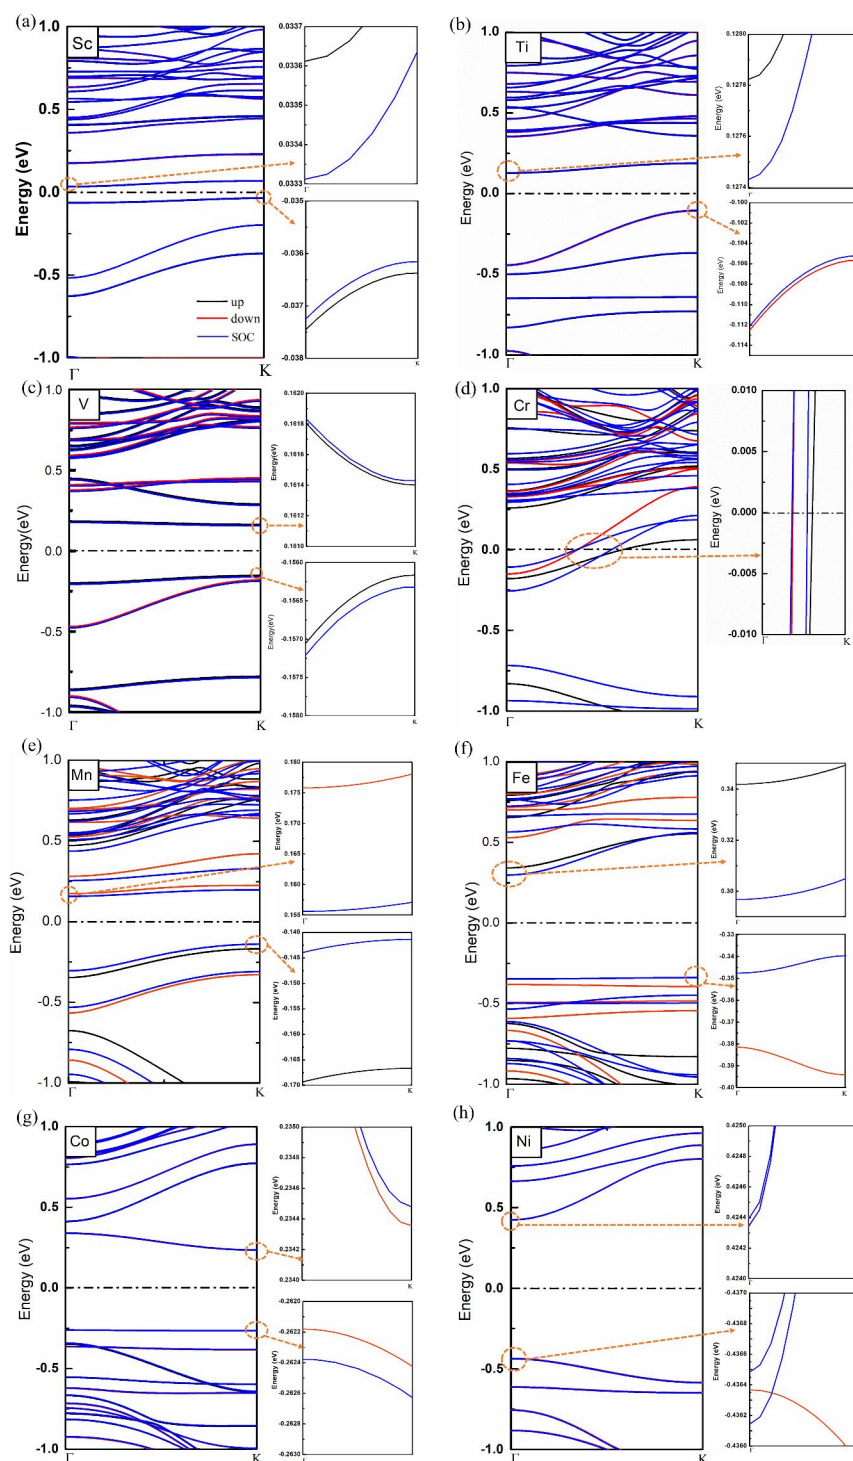

Fig. S4 The band structures of (a) Sc, (b) Ti, (c) V, (d) Cr, (e) Mn, (f) Fe, (g) Co and (h) Ni adsorbed H-APNRs. The black, red and blue colors show the band structure of spin up, down and the spin-orbit coupling, respectively..
